# Supplementary figures and images for: Targeting MutT homolog 1 (MTH1) for breast cancer suppression by a novel MTH1 inhibitor MA-24 with tumor-selective toxicity
Source: Preprints.org preprint supplement (doi:10.20944/preprints202312.1649.v1), 2023-12-21

**
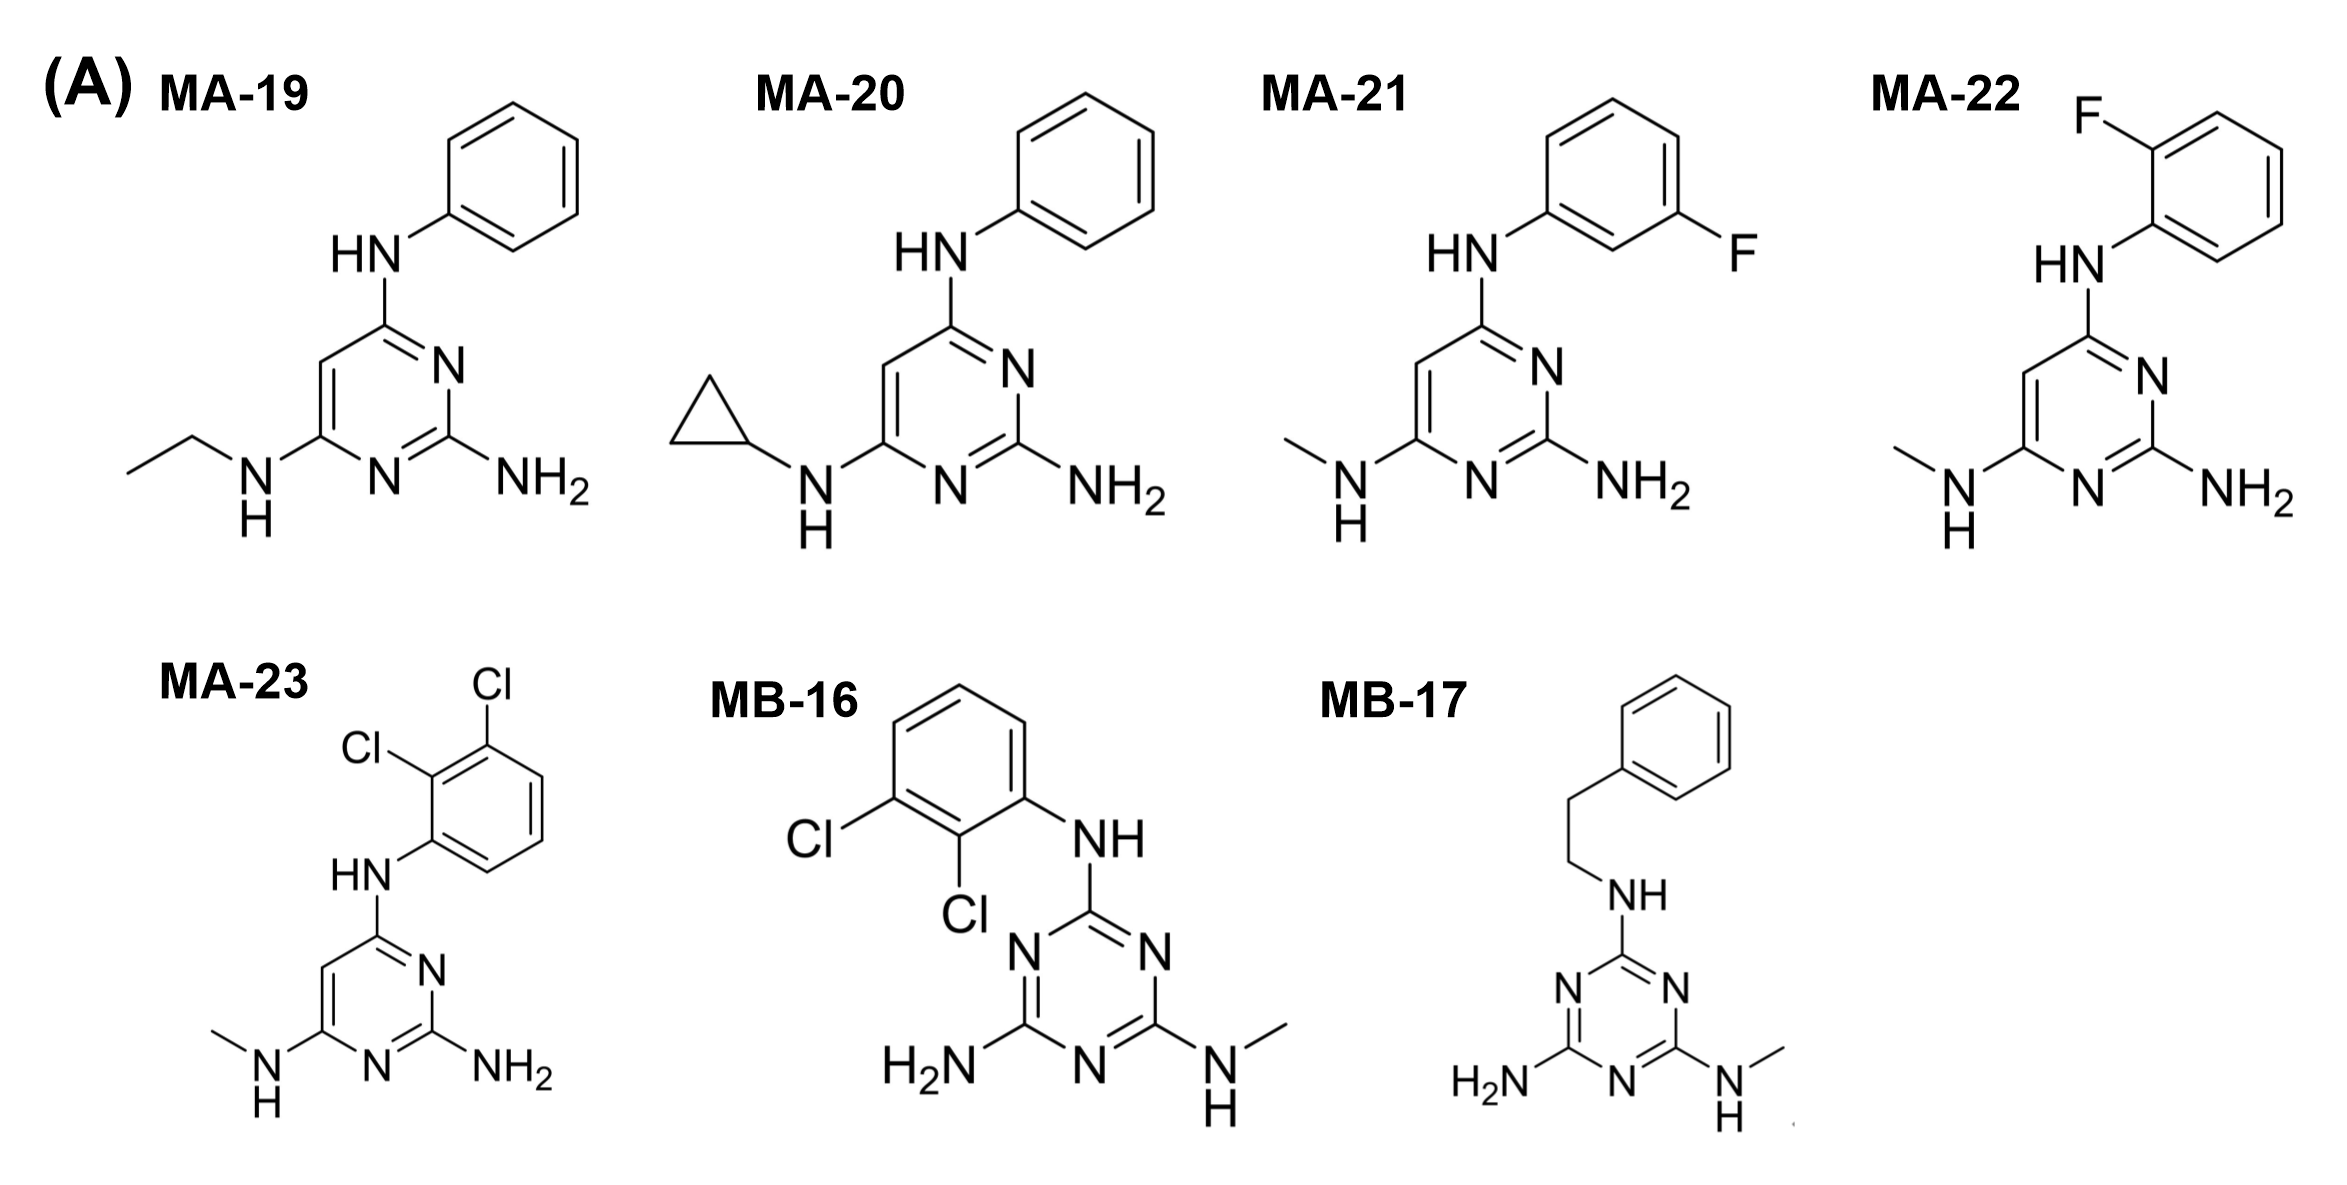
.**

**Figure S1.** Chemical structures of compounds MA-19 - MA-23, MB-16, and MB-17.

Supplement: Supplementary file 1 [file supplementary]
